# Supplementary material for: Unveiling Lovastatin’s Anti-Inflammatory Potential in Mouse’s Brain during Acute Trypanosoma cruzi Infection
Source: MDPI journal article supplement (doi:10.3390/biology13050301), 2024-04-27
Supplement: s1 [file s1]

## Supplementary Figure

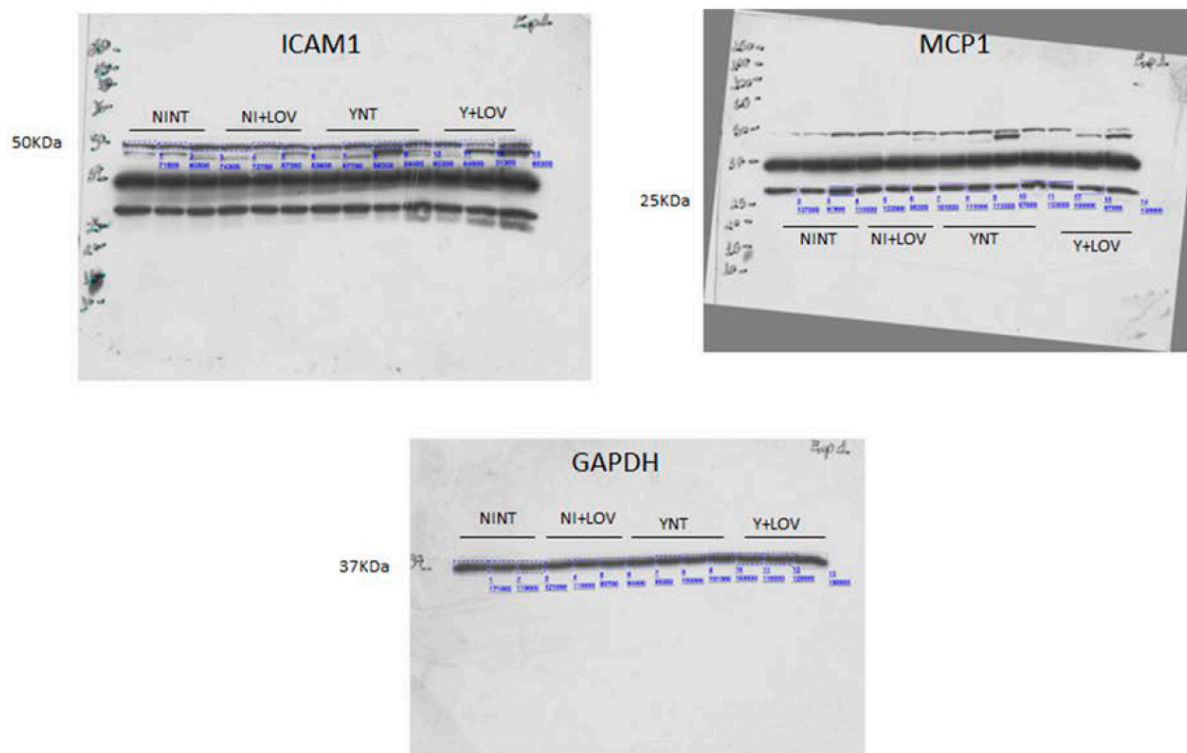

**Figure S1.** represents original western blot images for ICAM-1 and MCP-1, using samples from experiment 1, performed in the same membrane, with their loading control GAPDH.

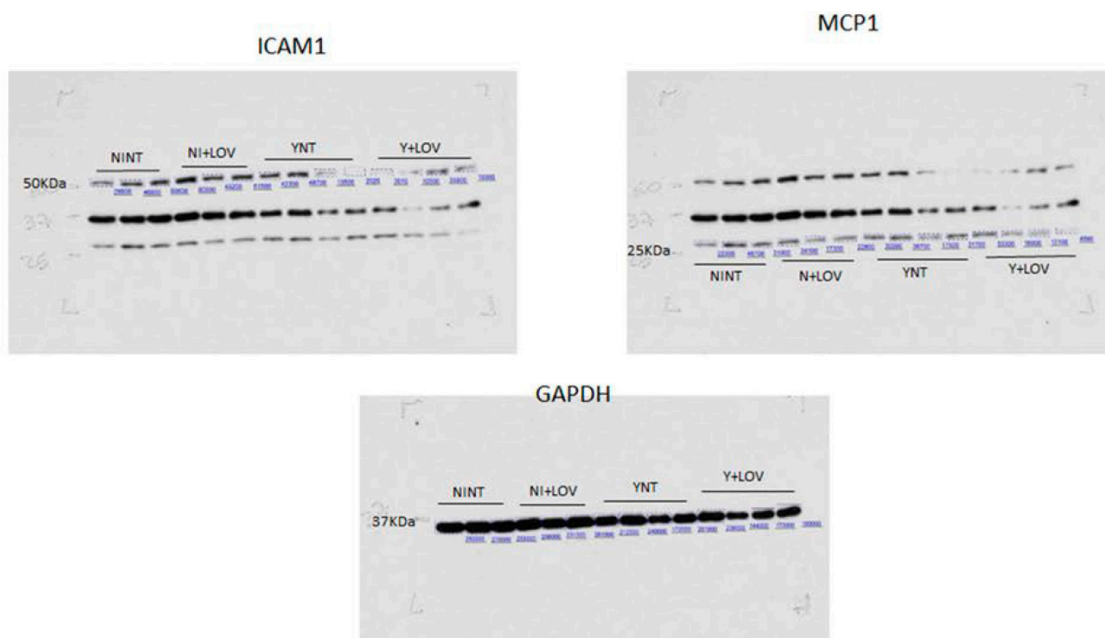

**Figure S2.** represents original western blot images for ICAM-1 and MCP-1, using samples from experiment 2, performed in the same membrane, with their loading control GAPDH.

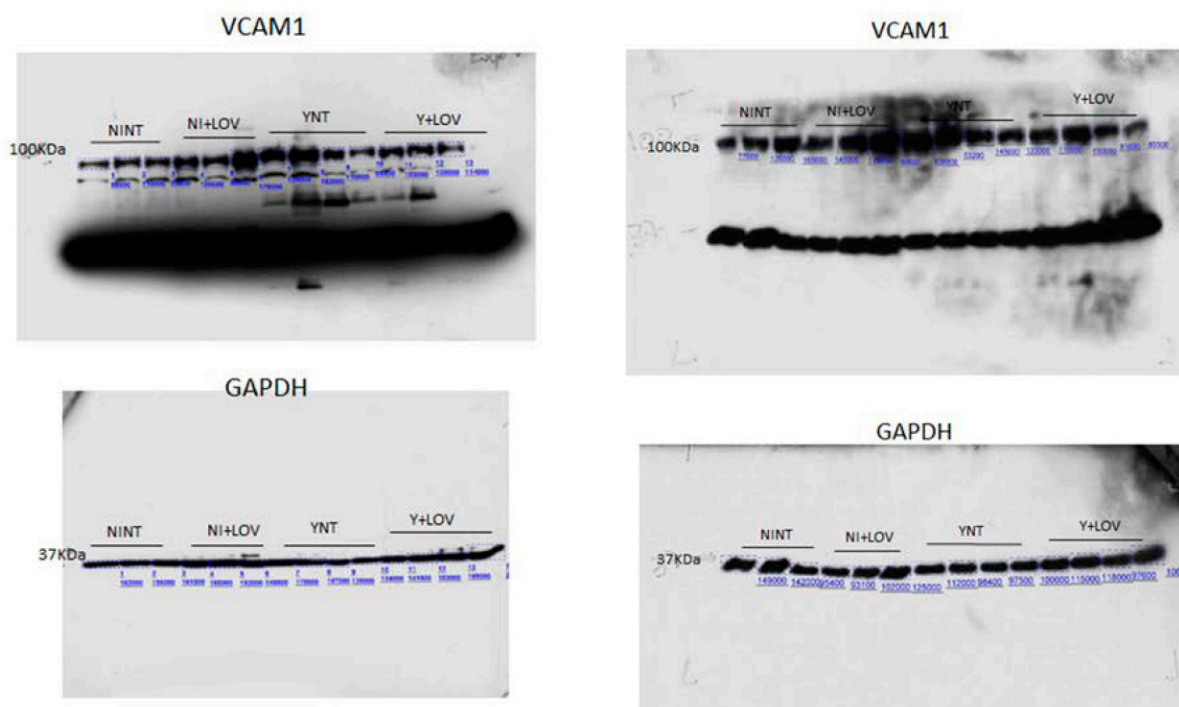

**Figure S3.** represents original western blot images for VCAM-1, using samples from experiment 1 and 2, with their loading control GAPDH.

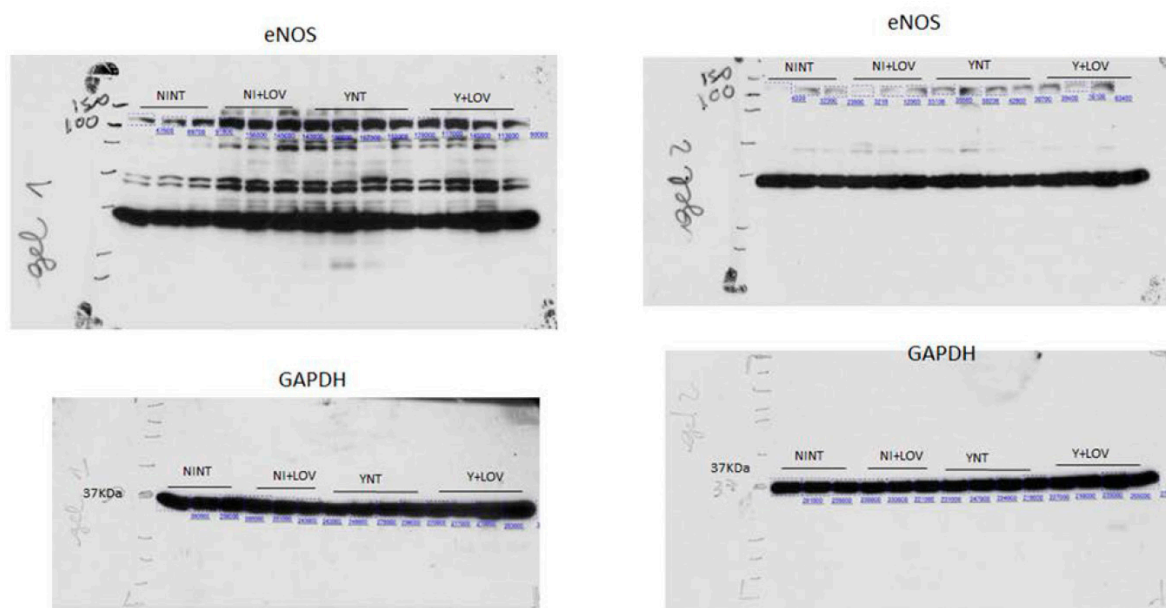

**Figure S4.** represents original western blot images for eNOS, using samples from experiment 1 and 2, with their loading control GAPDH.
